# Supplementary material for: Transcriptome Profiling Provides New Insights into the Molecular Mechanism Underlying the Sensitivity of Cotton Varieties to Mepiquat Chloride
Source: Int J Mol Sci. 2022 May 2;23(9):5043. doi: 10.3390/ijms23095043 (PMC9105546; doi:10.3390/ijms23095043)
Supplement: Supplementary file 1 [file ijms-23-05043-s001.zip › ijms-1588448-supplementary/Table S1-S4.xlsx]

## Sheet: Sheet1
Table S1. An overview of the RNA-sequencing results
Sample	Clean_reads	Clean_bases	Q30	GC_pct	Unique_map	Proper_map
		(G)	(%)	(%)	(%)	(%)
XW-1	44862643	6.73	93.53	43.55	92.07	90.12
XD-1	45591260	6.84	93.18	43.58	92.1	89.78
XW-3	44428679	6.66	93.77	43.57	92.07	90.07
XD-3	45343670	6.8	93.23	43.53	90.91	88.32
XW-6	44947698	6.74	93.82	43.48	92.27	90.31
XD-6	43821673	6.57	93.74	43.24	92.03	89.89
SW-1	47098799	7.07	93.7	43.3	91.9	89.92
SD-1	46704900	7.01	93.58	43.5	92.34	90.42
SW-3	45135087	6.77	93.49	43.2	91.87	89.87
SD-3	43919393	6.59	93.57	43.43	92.08	90.06
SW-6	43850957	6.58	93.5	42.78	91.55	88.86
SD-6	45982939	6.9	93.61	43.1	92.22	90.18
Note: Clean reads: Paired-end numbers of Clean Data; Clean bases: total base number of Clean Data; Q30: base which quality value is greater than or equal to 30 percentage of Clean Data; GC_pct: GC content percentage of Clean Data, namely the percentage of Clean Data base G and C; Unique_map: reads number mapped uniquely mapped to the reference genome and the percentage in Clean Reads; Proper_map:…
Table S2 Primers used for qRT-PCR assays in this study
Gene ID	Gene name	Forward primers (5'-3')	Reverse primers (5'-3')
GH_D09G1318	CKX1	CAAGCATTTCGGCATGGACC	ATTGCCCTAGTCCCCCAAGA
GH_A03G2246	SAUR50	ACCCCTCCCTTAGACGTACC	CGAACTCTTCTTCGGCTCGT
GH_A09G0176	GASA4	GGCTCTCATTGCCATCTCCAT	CTGGCTACACCTCCTTGTGC
GH_A10G0400	CAB21	CCCCTTCCACCCCTGAAAT	ACCATGGGCTACCAGAAGGA
GH_A04G0908	CDC48	AGCCACCAACCGACCTGATA	ATGCTCGTTGGCAAATTTCTGTGA
GH_D10G2713	CYP90	GGAATAAGCTGCCCCAGACA	CGCGTCGTTGGAAAGAAGAC
GH_A12G1852	TCP15	CCGGCAACGTTTTGGACAAT	ACCCAATTGTTGTCCGGGTT
GH_D05G1936	CKX5	TCTCGACTTTTACCAGGGACC	CGCCTCCATTAGGCTCAAGA
GH_A12G1501	TCP7	ATCGTCCACCACTGCTTCTC	CCTGGAAGAGCCCAGAATCC
Table S3. The data of co-expression network between hormone related genes and TFs in SD1068
Structural gene ID	Structural gene name	Transcription factor ID	Transcription factor name	Correlation coefficient
GH_A06G0724	PP2C56	GH_D11G2182	ZBTB8A	0.886052
GH_A10G0785	GA2ox8	GH_D11G2182	ZBTB8A	-0.829961
GH_D09G0919	GA2ox2	GH_D11G2182	ZBTB8A	-0.826762
GH_A05G1635	GA20ox2	GH_D05G2654	WRKY7	0.825649
GH_D13G2232	PP2C77	GH_D05G2654	WRKY7	-0.848288
GH_A13G2251	PP2C56	GH_A10G0109	WRKY6	0.917825
GH_A01G1093	LOG1	GH_D10G0121	WRKY6	-0.824449
GH_D13G2232	PP2C77	GH_A12G2543	WRKY53	0.806139
GH_D13G2153	CKX7	GH_D12G2563	WRKY53	0.809867
GH_A03G2247	AUX15A	GH_D12G2563	WRKY53	-0.822663
GH_A05G1688	GA2ox8	GH_A11G0997	WRKY46	-0.844936
GH_D13G2232	PP2C77	GH_A11G0997	WRKY46	-0.856132
GH_A07G0464	GA2ox8	GH_D06G2141	WRKY40	-0.820248
GH_D10G1659	IAA4	GH_A09G1126	WIP3	-0.805634
GH_D10G2713	CYP90A1	GH_D07G1179	WIP3	0.809309
GH_A10G2603	CYP90A1	GH_A12G2447	TCP9	0.814907
GH_D13G2153	CKX7	GH_A12G2447	TCP9	0.837225
GH_D02G2416	SAUR50	GH_D07G2547	TCP20	0.800905
GH_D02G2422	AUX15A	GH_A12G1954	TCP14	-0.823533
GH_A10G2460	PP2C37	GH_D07G0704	TCP14	-0.858543
GH_D06G2184	GA3ox1	GH_D07G0704	TCP14	-0.806813
GH_D05G0393	CKX7	GH_A07G0689	RVE7	-0.941085
GH_D09G0919	GA2ox2	GH_A07G0689	RVE7	0.805634
GH_D02G2416	SAUR50	GH_A06G1004	RAP2-7	0.939521
GH_D03G1550	LOG3	GH_A06G1004	RAP2-7	-0.865717
GH_A03G2247	AUX15A	GH_A08G0583	MYB20	0.803933
GH_D01G1143	SAUR50	GH_A08G1981	MYB20	0.828488
GH_D02G1916	GH3.17	GH_A08G1981	MYB20	-0.868675
GH_D10G1659	IAA4	GH_A08G1981	MYB20	0.822484
GH_D06G0850	AUX15A	GH_D08G0582	MYB20	-0.872977
GH_A10G2460	PP2C37	GH_D07G2195	NAC091	-0.825058
GH_D01G1143	SAUR50	GH_A03G1734	NAC083	-0.830301
GH_D02G1916	GH3.17	GH_A03G1734	NAC083	0.934107
GH_D09G1896	GA20ox2	GH_A03G1734	NAC083	-0.807758
GH_D10G1659	IAA4	GH_A03G1734	NAC083	-0.808964
GH_A09G1993	PP2C8	GH_D07G2562	NAC083	0.891906
GH_A09G1993	PP2C8	GH_A04G0282	NAC072	-0.80017
GH_D10G2569	PP2C37	GH_A04G0282	NAC072	-0.85596
GH_D07G0465	GA20ox1	GH_D01G0637	NAC056	-0.817307
GH_D02G2430	AUX15A	GH_D13G1652	NAC056	0.800939
GH_A05G1051	LOG1	GH_A02G1096	NAC043	0.812524
GH_D03G1550	LOG3	GH_A02G1096	NAC043	-0.803551
GH_D09G0919	GA2ox2	GH_D07G2358	NAC021	-0.825383
GH_A09G1993	PP2C8	GH_D02G0800	NAC002	0.808677
GH_D02G2421	AUX15A	GH_D02G0800	NAC002	-0.833759
GH_D10G2569	PP2C37	GH_D02G0800	NAC002	0.874864
GH_A06G0724	PP2C56	GH_A03G0304	MYB86	-0.927319
GH_A10G0785	GA2ox8	GH_A03G0304	MYB86	0.905501
GH_A04G0335	GH3.17	GH_D09G0598	MYB62	0.813986
GH_D01G2559	PYL4	GH_D09G0598	MYB62	-0.900004
GH_A04G0335	GH3.17	GH_A07G1434	MYB61	0.871471
GH_D10G0789	GA20ox2	GH_D07G1426	MYB61	0.805617
GH_D13G0999	SAUR50	GH_D05G2774	MYB6	0.833401
GH_D10G1659	IAA4	GH_A03G2101	MYB44	0.813046
GH_A05G1635	GA20ox2	GH_A05G2634	MYB44	0.807923
GH_D13G2232	PP2C77	GH_A05G2634	MYB44	-0.853205
GH_A01G2484	PYL4	GH_A08G2661	NAC42	0.959627
GH_D02G1916	GH3.17	GH_A08G2661	NAC42	-0.840239
GH_D01G2559	PYL4	GH_A10G0669	GATA9	0.892664
GH_D07G0465	GA20ox1	GH_A10G0669	GATA9	-0.84811
GH_A05G4343	PP2C8	GH_A01G0292	GATA15	-0.841343
GH_A09G1942	GA2OX2	GH_A01G0292	GATA15	0.900229
GH_D02G1916	GH3.17	GH_A01G0292	GATA15	0.849575
GH_A05G1688	GA2ox8	GH_D02G1944	ERF9	-0.823522
GH_D06G0907	CKX7	GH_D02G1944	ERF9	0.800605
GH_D13G2232	PP2C77	GH_D02G1944	ERF9	-0.80391
GH_D05G2600	SAUR50	GH_A08G2834	DREB3	0.828687
GH_D10G2713	CYP90A1	GH_A08G2834	DREB3	0.829998
GH_D01G1134	LOG3	GH_D06G0690	DREB3	-0.80254
GH_A13G2251	PP2C56	GH_D06G1018	DREB3	0.865515
GH_D04G0671	PP2C37	GH_D06G1018	DREB3	0.819607
GH_A09G1993	PP2C8	GH_D02G2036	COL12	0.827885
GH_D13G0199	PP2C37	GH_D02G2036	COL12	-0.860554
GH_D09G1896	GA20ox2	GH_A13G1745	BZIP61	0.816248
GH_D10G2713	CYP90A1	GH_A13G1745	BZIP61	-0.898312
GH_D02G2418	AUX15A	GH_D01G0544	BZIP61	0.803546
GH_A10G1189	IAA4	GH_A05G1908	BZIP44	-0.830155
GH_A07G0464	GA2ox8	GH_A12G0623	BZIP44	0.926899
GH_A13G2251	PP2C56	GH_D12G2298	BHLH71	0.839627
GH_D03G1550	LOG3	GH_D12G2298	BHLH71	0.880758
GH_A10G1189	IAA4	GH_A13G0532	BHLH30	0.848071
GH_D02G2416	SAUR50	GH_D13G0715	BHLH30	0.860149
GH_D02G2422	AUX15A	GH_D13G0715	BHLH30	-0.80227
GH_A09G1993	PP2C8	GH_D07G0734	BEE3	-0.834847
GH_A05G1051	LOG1	GH_A02G0372	AUX22B	-0.829404
GH_A10G0785	GA2ox8	GH_A02G0372	AUX22B	0.80189
GH_D03G1550	LOG3	GH_A02G0372	AUX22B	0.931496
GH_A03G2249	AUX15A	GH_A07G0100	OsC3H49	-0.825662
GH_D13G2153	CKX7	GH_A08G2776	OsC3H49	-0.836582
GH_A03G2247	AUX15A	GH_A08G2830	OsC3H49	0.848763
GH_A10G2603	CYP90A1	GH_A08G2830	OsC3H49	-0.821583
GH_D08G2804	CKX7	GH_A08G2830	OsC3H49	-0.848697
GH_A01G1093	LOG1	GH_D07G0106	OsC3H49	0.865562
GH_A05G3670	PP2C37	GH_D13G2221	OsC3H49	0.878308
GH_A06G0724	PP2C56	GH_D13G2221	OsC3H49	-0.866428
GH_D09G0919	GA2ox2	GH_D13G2221	OsC3H49	0.843368
Table S4. The data of co-expression network between hormone related genes and TFs in XLZ74
Structural gene ID	Structural gene name	Transcription factor ID	Transcription factor name	Correlation coefficient
GH_D06G0701	PP2C56	GH_A13G0454	ZAT10	-0.815733
GH_A12G2829	PP2C75	GH_A13G0454	ZAT10	-0.855846
GH_D04G1532	ARR4	GH_A06G2073	WRKY70	-0.872919
GH_D02G2418	AUX15A	GH_D05G2806	WRKY70	-0.850971
GH_D07G1398	GA2ox2	GH_D04G0133	WRKY70	0.868194
GH_A06G0724	PP2C56	GH_A06G2073	WRKY70	-0.864796
GH_D06G0701	PP2C56	GH_D04G0133	WRKY70	-0.805509
GH_A10G0417	GA2ox1	GH_D13G0081	WRKY54	-0.905768
GH_A07G1409	GA2ox2	GH_D13G0081	WRKY54	0.819431
GH_D08G2786	PP2C77	GH_D06G0921	WRKY50	-0.829922
GH_D03G0115	CYP90D1	GH_D09G2545	WRKY23	0.935677
GH_A05G0933	PP2C3	GH_A08G1960	WRKY23	0.836057
GH_D07G1398	GA2ox2	GH_D01G2184	TGA7	-0.840326
GH_D06G0701	PP2C56	GH_D01G2184	TGA7	0.804447
GH_A10G1189	IAA4	GH_A12G1898	TCP12	0.923762
GH_A08G2793	PP2C77	GH_A12G1898	TCP12	-0.815035
GH_D13G2232	PP2C77	GH_A12G1898	TCP12	-0.834068
GH_D02G2421	AUX15A	GH_D10G1004	RL6	0.824055
GH_D13G0136	CKX6	GH_A01G1131	RL6	0.810449
GH_A10G2677	CKX6	GH_A11G0465	RL3	-0.821087
GH_D11G1915	CYP90D1	GH_A11G0465	RL3	0.862032
GH_A10G0417	GA2ox1	GH_A11G0465	RL3	-0.881348
GH_D09G0919	GA2ox2	GH_A11G0465	RL3	0.802239
GH_D06G2184	GA3ox1	GH_A11G0465	RL3	-0.807365
GH_D02G2418	AUX15A	GH_D12G1851	PRE5	0.96271
GH_A09G2432	AUX22D	GH_A12G1853	PRE5	-0.860112
GH_D13G0136	CKX6	GH_A12G1853	PRE5	-0.806655
GH_A11G1392	IAA11	GH_A13G0781	PRE5	-0.909018
GH_A13G0985	SAUR50	GH_A13G0781	PRE5	-0.88769
GH_D06G2184	GA3ox1	GH_D09G1359	PLT1	-0.831257
GH_D12G2853	PP2C75	GH_D09G1359	PLT1	-0.815612
GH_A04G1191	ARR4	GH_D07G1680	PIF1	0.864935
GH_A11G1242	GID1B	GH_D07G1680	PIF1	-0.880937
GH_D05G2600	SAUR50	GH_D07G1680	PIF1	-0.846115
GH_A10G2677	CKX6	GH_A07G1980	MYB20	-0.803879
GH_D11G1915	CYP90D1	GH_A07G1980	MYB20	0.824389
GH_D06G2184	GA3ox1	GH_A07G1980	MYB20	-0.801468
GH_A03G2245	SAUR50	GH_D09G1886	MYB20	-0.894361
GH_A11G1242	GID1B	GH_D04G0333	NAC104	0.936191
GH_D05G2600	SAUR50	GH_D04G0333	NAC104	0.803695
GH_D04G1532	ARR4	GH_A03G0068	NAC071	0.847853
GH_D11G1427	IAA11	GH_A03G0068	NAC071	-0.844741
GH_D13G0136	CKX6	GH_A11G2692	NAC047	-0.888615
GH_A08G2793	PP2C77	GH_A11G2692	NAC047	0.848133
GH_D04G1532	ARR4	GH_D09G1979	NAC043	0.810727
GH_D02G2420	AUX15A	GH_A12G1326	NAC043	0.847642
GH_D11G1271	GID1B	GH_A09G2032	NAC043	0.901444
GH_D04G1532	ARR4	GH_D12G0375	NAC035	0.914404
GH_D02G2421	AUX15A	GH_D12G0375	NAC035	0.812367
GH_D13G2232	PP2C77	GH_A01G0996	NAC031	-0.863953
GH_D01G0694	GH3.6	GH_D05G3503	NAC021	0.88986
GH_D05G2600	SAUR50	GH_A08G2175	NAC021	-0.820028
GH_D04G1532	ARR4	GH_A06G0500	NAC002	0.820609
GH_A05G0550	IAA29	GH_D02G0800	NAC002	0.816428
GH_D06G1621	GA2ox1	GH_A05G0291	MYBS3	0.811688
GH_A05G0550	IAA29	GH_D05G0296	MYBS3	0.809287
GH_A03G2245	SAUR50	GH_A05G0291	MYBS3	-0.818718
GH_D01G0693	GH3.6	GH_A05G2634	MYB44	0.901474
GH_A10G0417	GA2ox1	GH_A08G1503	MYB3	0.870574
GH_A05G0148	IAA29	GH_A08G1503	MYB3	-0.835864
GH_D08G0684	AUX22D	GH_D11G1394	MYB14	0.850715
GH_D07G0434	IAA29	GH_D08G2656	NAC42	0.895727
GH_A10G1189	IAA4	GH_D08G2655	NAC42	-0.962581
GH_D13G2232	PP2C77	GH_D08G2655	NAC42	0.849207
GH_D02G2418	AUX15A	GH_D11G0216	GL3	-0.830461
GH_D01G0694	GH3.6	GH_D11G0216	GL3	-0.85198
GH_D12G2853	PP2C75	GH_D11G0216	GL3	-0.832093
GH_D04G1532	ARR4	GH_D12G2181	ERF105	0.86066
GH_D02G2421	AUX15A	GH_D12G2181	ERF105	0.804203
GH_D08G0684	AUX22D	GH_A12G2166	ERF105	-0.85437
GH_A03G2247	AUX15A	GH_A03G1809	ERF053	0.821238
GH_A05G0148	IAA29	GH_A03G1809	ERF053	0.833342
GH_A10G1189	IAA4	GH_D12G1116	ERF034	0.857472
GH_A12G2829	PP2C75	GH_D12G1116	ERF034	-0.869067
GH_D08G0684	AUX22D	GH_A05G0351	ERF003	-0.863066
GH_D01G0693	GH3.6	GH_A06G2104	ERF003	0.851009
GH_D11G1427	IAA11	GH_A06G2104	ERF003	0.85727
GH_D13G0136	CKX6	GH_A06G0711	DREB3	0.807243
GH_A10G0417	GA2ox1	GH_D08G2827	DREB3	0.823188
GH_D06G2184	GA3ox1	GH_D08G2827	DREB3	0.804607
GH_A11G1242	GID1B	GH_A06G0711	DREB3	-0.859367
GH_A05G0550	IAA29	GH_A09G0918	DREB3	0.812515
GH_A12G2829	PP2C75	GH_D09G0952	DREB3	0.850796
GH_D05G2600	SAUR50	GH_A09G0918	DREB3	0.808492
GH_A11G2789	AUX22D	GH_A05G3499	BZIP19	-0.84489
GH_D06G1621	GA2ox1	GH_A05G3499	BZIP19	-0.847862
GH_D11G1915	CYP90D1	GH_A02G1547	BHLH96	-0.809314
GH_D01G0694	GH3.6	GH_D03G0413	BHLH96	-0.832146
GH_D05G0566	IAA29	GH_D03G0413	BHLH96	-0.827912
GH_A05G4209	ARR9	GH_A11G2218	BHLH93	0.817744
GH_A13G0135	CKX6	GH_A11G2218	BHLH93	-0.82102
GH_D13G2232	PP2C77	GH_A01G1235	BHLH93	0.821304
GH_A13G0985	SAUR50	GH_A02G1722	BHLH93	0.86921
GH_A08G2793	PP2C77	GH_D12G0278	BHLH63	0.858186
GH_D13G0136	CKX6	GH_D12G0278	BHLH63	-0.916765
GH_A09G2432	AUX22D	GH_A10G2651	BHLH51	-0.894177
GH_D06G2184	GA3ox1	GH_A10G2651	BHLH51	-0.840506
GH_D04G1532	ARR4	GH_A05G1181	AP2	0.911461
GH_D02G2421	AUX15A	GH_A05G1181	AP2	0.830781
GH_D01G0694	GH3.6	GH_D01G2423	AP2	0.837333
GH_D11G1427	IAA11	GH_A05G1181	AP2	-0.849676
